# Supplementary material for: Direct Role of Adiponectin and Adiponectin Receptors in Endometrial Cancer: In Vitro and Ex Vivo Studies in Humans
Source: Oxford University Press journal article supplement (doi:10.1158/1535-7163.mct-11-0545), 2011-10-06
Supplement: 15357163mct110545-sup-sdata_1_pdf_66k.pdf [file 15357163mct110545-sup-sdata_1_pdf_66k.pdf]

**Supplementary data 1. Descriptive characteristics of study participants.**

|                                    | US Study                               |                                        | Greek Study                                     |                                                     |                      |                              |                                          |
|------------------------------------|----------------------------------------|----------------------------------------|-------------------------------------------------|-----------------------------------------------------|----------------------|------------------------------|------------------------------------------|
|                                    | Subjects with<br>Endometrial<br>Cancer | Subjects with<br>Endometrial<br>Cancer | Subjects with<br>secretory non-<br>tumor tissue | Subjects with<br>proliferative non-<br>tumor tissue | Pregnant<br>subjects | Subjects with<br>hyperplasia | Subjects with<br>atrophic<br>endometrium |
| Endometrial carcinoma,<br><i>n</i> | 23                                     | 35                                     | 12                                              | 12                                                  | 10                   | 9                            | 8                                        |
| Age, years<br>(mean $\pm$ SD)      | 55.0 $\pm$ 13.7                        | 65.9 $\pm$ 12.1                        | 37.8 $\pm$ 6.1                                  | 34.4 $\pm$ 6.1                                      | 26.6 $\pm$ 6.9       | 46.1 $\pm$ 3.7               | 56.9 $\pm$ 7.1                           |
| FIGO stage, <i>n</i> (%)           |                                        |                                        |                                                 |                                                     |                      |                              |                                          |
| I                                  | 12 (52.2)                              | 28 (81.1)                              |                                                 |                                                     |                      |                              |                                          |
| II                                 | 2 (8.7)                                | 6 (16.2)                               |                                                 |                                                     |                      |                              |                                          |
| III                                | 6 (26.1)                               | 0 (0)                                  |                                                 |                                                     |                      |                              |                                          |
| IV                                 | 1 (4.3)                                | 0 (0)                                  |                                                 |                                                     |                      |                              |                                          |
| Unknown                            | 2 (8.7)                                | 1 (2.7)                                |                                                 |                                                     |                      |                              |                                          |
